# Supplementary material for: A green mesostructured vanadosilicate catalyst and its unprecedented catalytic activity for the selective synthesis of 2,6-disubstituted p-benzoquinones
Source: Royal Society of Chemistry journal article supplement (doi:10.1039/c3dt52329b), 2013-10-25
Supplement: c3dt52329b.pdf [file c3dt52329b.pdf]

## Supplementary Information

**Table S1:** Physicochemical properties of calcined VSBA-15 catalysts, **W-VSBA-15(5)**, and recyclable VSBA-15 catalysts

| Catalysts                 | $n_{\text{H}_2\text{O}}/n_{\text{HCl}}$ | $n_{\text{Si}}/n_{\text{V}}$ ratio |                       | $a_0$<br>(Å) | $A_{\text{BET}}$<br>(m <sup>2</sup> /g) | $d_p$<br>(Å) | $V_p$<br>(cm <sup>3</sup> /g) | $t_w = a_0 - d_p$<br>(Å) |
|---------------------------|-----------------------------------------|------------------------------------|-----------------------|--------------|-----------------------------------------|--------------|-------------------------------|--------------------------|
|                           |                                         | Gel                                | calcined <sup>a</sup> |              |                                         |              |                               |                          |
| VSBA-15(5)                | 295                                     | 5                                  | 14.8                  | 122.9        | 709                                     | 83.4         | 1.03                          | 39.5                     |
| VSBA-15(10)               | 295                                     | 10                                 | 18.2                  | 122.6        | 742                                     | 83.6         | 1.08                          | 39.0                     |
| VSBA-15(15)               | 295                                     | 15                                 | 31.5                  | 122.2        | 773                                     | 84.1         | 1.09                          | 38.1                     |
| VSBA-15(20)               | 295                                     | 20                                 | 42.3                  | 121.3        | 820                                     | 84.7         | 1.10                          | 36.6                     |
| VSBA-15(25)               | 295                                     | 25                                 | 53.4                  | 119.7        | 863                                     | 85.1         | 1.11                          | 34.6                     |
| VSBA-15(50)               | 295                                     | 50                                 | 87.5                  | 118.8        | 890                                     | 86.3         | 1.17                          | 31.9                     |
| SiSBA-15                  | 40                                      | -                                  | -                     | 118.2        | 908                                     | 87.4         | 1.07                          | 30.8                     |
| VMCM-41(40)               | -                                       | 40                                 | 42.2                  | 45.4         | 869                                     | 27.7         | 0.72                          | 17.7                     |
| W-VSBA-15(5) <sup>b</sup> | -                                       | -                                  | 19.5                  | 122.4        | 710                                     | 83.8         | 1.07                          | 38.6                     |
| VSBA-15(5) <sup>c</sup>   | -                                       | -                                  | 19.4                  | 122.3        | 713                                     | 83.8         | 1.07                          | 38.5                     |
| VSBA-15(50) <sup>c</sup>  | -                                       | -                                  | 87.7                  | 114.5        | 740                                     | 84.1         | 0.95                          | 30.4                     |

$a_0$ , unit cell parameter;  $A_{\text{BET}}$ , specific surface area;  $d_p$ , pore diameter;  $V_p$ , pore volume; pore wall thickness ( $t_w$ ) = unit cell parameter ( $a_0$ ) – pore diameter ( $d_p$ ).

<sup>a</sup> The results of  $n_{\text{Si}}/n_{\text{V}}$  ratios in the products are determined by ICP-AES.

<sup>b</sup> Washed catalyst.

<sup>c</sup> The recyclable catalysts were used for 4<sup>th</sup> run.

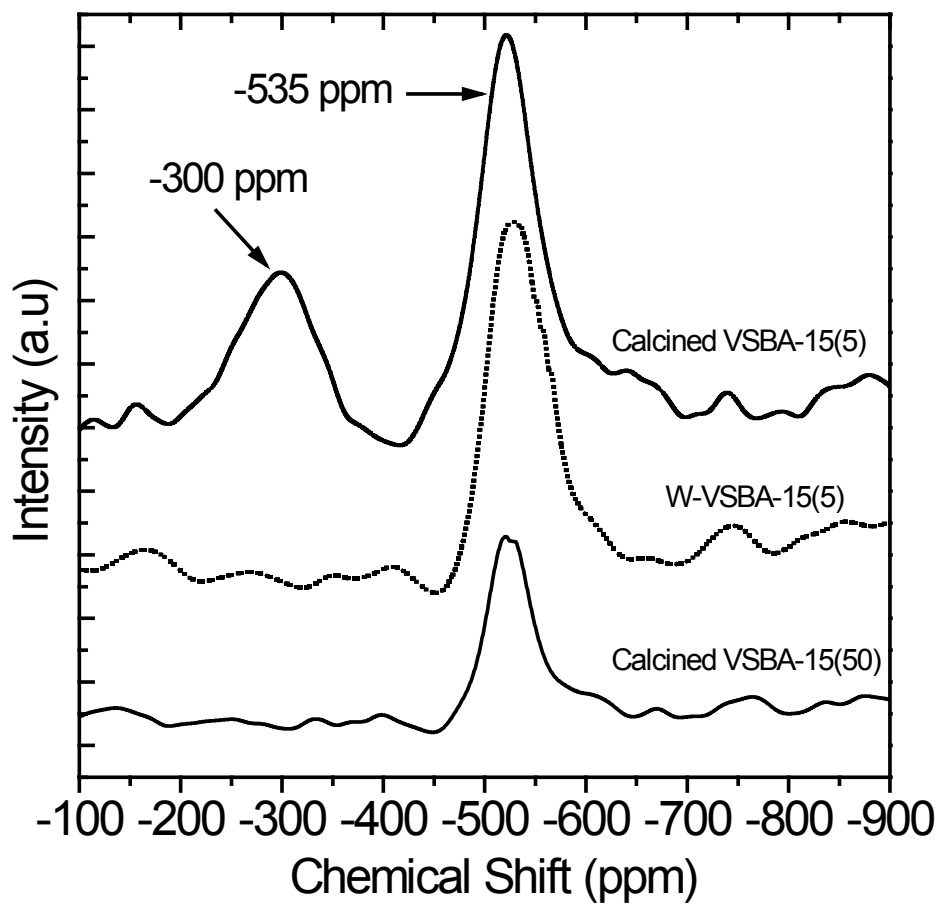

**Figure S1:**  $^{51}\text{V}$  MAS NMR spectra of VSBA-15 catalysts

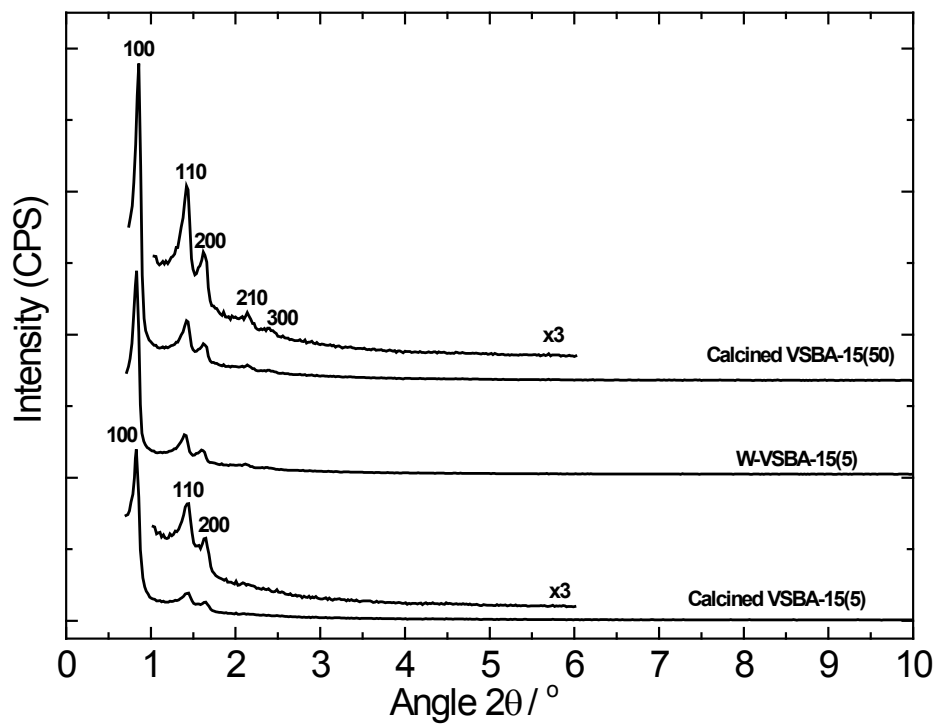

**Figure S2:** XRD powder patterns of calcined VSBA-15 catalysts

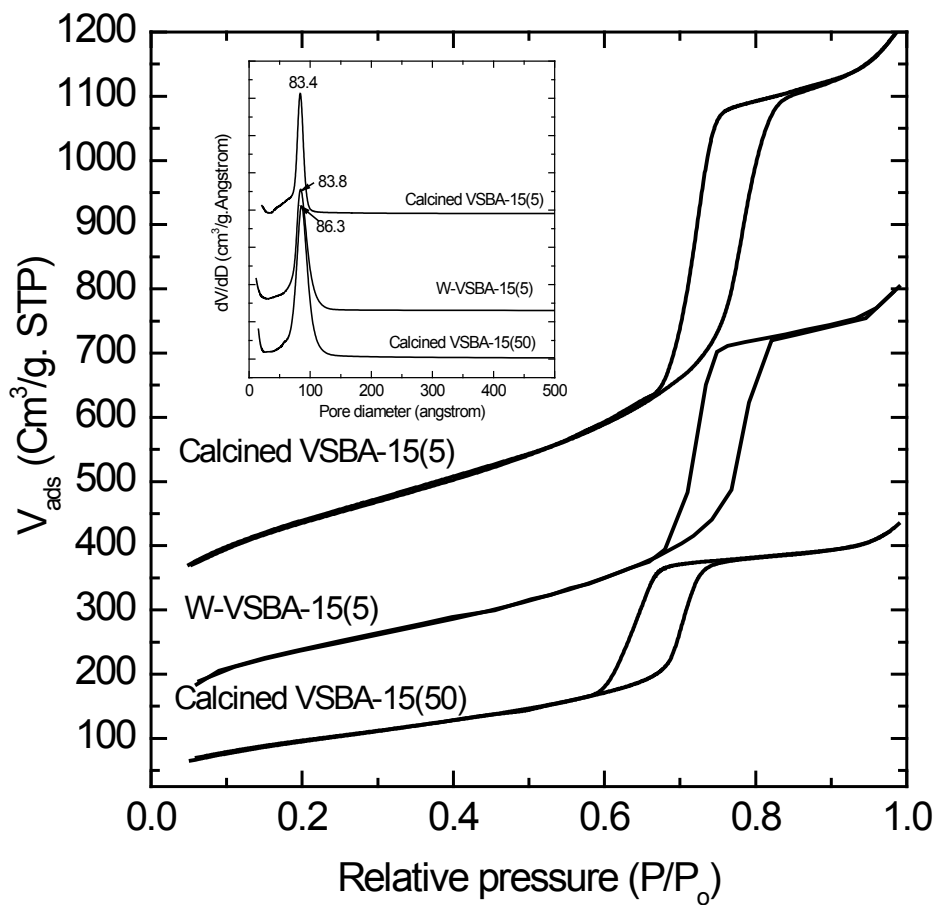

**Figure S3:**  $\text{N}_2$  adsorption isotherms of VSBA-15 catalysts
